# Supplementary material for: A New Species of Scymnus (Coleoptera, Coccinellidae) from Pakistan with Mitochondrial Genome and Its Phylogenetic Implications
Source: MDPI journal article supplement (doi:10.3390/insects15050371), 2024-05-19
Supplement: s1 [file s1]

**Table S1.** Summary of the mitogenome of *Scymnus (Pullus) cardi* sp. nov.

| Genes          | Position    | Length<br>(bp) | Start<br>Codon | Stop<br>codon    | Anticodon | Direction | Intergenic<br>Nucleotide |
|----------------|-------------|----------------|----------------|------------------|-----------|-----------|--------------------------|
| trnI           | 1-62        | 62             |                |                  | GAT       | Forward   | 0                        |
| trnQ           | 62-127      | 66             |                |                  | TTG       | Reverse   | -2                       |
| trnM           | 129-197     | 69             |                |                  | CAT       | Forward   | -1                       |
| ND2            | 198-1199    | 1002           | AAT            | TAA              |           | Forward   | -4                       |
| trnW           | 1203-1270   | 68             |                |                  | TCA       | Forward   | 7                        |
| trnC           | 1263-1323   | 61             |                |                  | GCA       | Reverse   | -2                       |
| trnY           | 1325-1387   | 63             |                |                  | GTA       | Reverse   | -2                       |
| COX1           | 1389-2921   | 1533           | ATA            | TAG              |           | Forward   | -3                       |
| trnL2          | 2924-2987   | 64             |                |                  | TAA       | Forward   | -1                       |
| COX2           | 2988-666    | 679            | ATA            | TAG              |           | Forward   | -1                       |
| trnK           | 3667-3736   | 70             |                |                  | CTT       | Forward   | 0                        |
| trnD           | 3736-3800   | 65             |                |                  | GTC       | Forward   | -1                       |
| ATP8           | 3801-3953   | 153            | ATT            | TAG              |           | Forward   | 6                        |
| ATP6           | 3947-4607   | 661            | ATG            | TAA <sup>1</sup> |           | Forward   | -1                       |
| COX3           | 4608-5388   | 781            | ATG            | TAA <sup>1</sup> |           | Forward   | -1                       |
| trnG           | 5389-5452   | 64             |                |                  | TCC       | Forward   | -1                       |
| ND3            | 5453-5806   | 354            | ATT            | TAG              |           | Forward   | 1                        |
| trnA           | 5805-5867   | 63             |                |                  | TGC       | Forward   | 0                        |
| trnR           | 5867-5931   | 65             |                |                  | TCG       | Forward   | 2                        |
| trnN           | 5929-5993   | 65             |                |                  | GTT       | Forward   | -1                       |
| trnS1          | 5994-6050   | 57             |                |                  | TCT       | Forward   | -1                       |
| trnE           | 6051-6113   | 63             |                |                  | TTC       | Forward   | 1                        |
| trnF           | 6112-6175   | 64             |                |                  | GAA       | Reverse   | -1                       |
| ND5            | 6176-7890   | 1715           | ATT            | TAA              |           | Reverse   | -1                       |
| trnH           | 7891-7952   | 62             |                |                  | GTG       | Reverse   | -1                       |
| ND4            | 7953-9270   | 1318           | TAT            | TAA              |           | Reverse   | 3                        |
| ND4L           | 9267-9551   | 285            | ATA            | TTA              |           | Reverse   | -1                       |
| trnT           | 9552-9616   | 65             |                |                  | TGT       | Forward   | -1                       |
| trnP           | 9617-9679   | 63             |                |                  | TGG       | Reverse   | -3                       |
| ND6            | 9682-10184  | 503            | TAT            | TAA              |           | Forward   | 0                        |
| CYTB           | 10184-11311 | 1128           | ATA            | TAA              |           | Forward   | 1                        |
| trnS2          | 11310-11375 | 66             |                |                  | TGA       | Forward   | -18                      |
| ND1            | 11393-12340 | 948            | TAT            | CTA              |           | Reverse   | -4                       |
| trnL1          | 12344-12405 | 62             |                |                  | TAG       | Reverse   | -1                       |
| l-rRNA         | 12406-13682 | 1276           |                |                  |           | Reverse   | -1                       |
| trnV           | 13683-13748 | 66             |                |                  | TAC       | Reverse   | 0                        |
| s-rRNA         | 13748-14540 | 793            |                |                  |           | Reverse   | -1                       |
| Control region | 14541-15416 | 876            |                |                  |           | -         |                          |

The exponent numerals in the gene column are used to differentiate each of the two Leucine- and Serine-specifying transfer RNAs (tRNAs) (L1 and L2, S1 and S2); TAA<sup>1</sup> stop codon is completed by the addition of 3' A residues to mRNA; (T-) stop codon not determined.

**Table S2.** Nucleotide composition of the *Scymnus (Pullus) cardi* sp. nov. mitogenome. Protein-coding genes (PCGs), ribosomal RNAs (rRNAs), and transfer RNAs (tRNAs).

| Feature               | Proportion (%) |      |      |      |       |       | Skew  |       | Nucleotide (bp) |
|-----------------------|----------------|------|------|------|-------|-------|-------|-------|-----------------|
|                       | A              | C    | G    | T    | A + T | G + C | AT    | GC    |                 |
| <b>Whole genome</b>   | 40.4           | 12.9 | 8.6  | 38.1 | 78.5  | 21.5  | 0.03  | -0.20 | <b>15,416</b>   |
| <b>PCGs</b>           | 39.5           | 13.5 | 9.3  | 37.7 | 77.2  | 22.8  | 0.02  | -0.18 | <b>11,060</b>   |
| <b>ATP6</b>           | 34.7           | 15.1 | 10   | 40.2 | 74.9  | 25.1  | -0.07 | -0.20 | 153             |
| <b>ATP8</b>           | 45.1           | 5.9  | 3.3  | 45.8 | 90.9  | 9.2   | -0.01 | -0.28 | 661             |
| <b>CYTB</b>           | 32.1           | 15.7 | 11.1 | 41.1 | 73.2  | 26.8  | -0.12 | -0.17 | 1,128           |
| <b>COX1</b>           | 31.3           | 15.4 | 13.9 | 39.4 | 70.7  | 29.3  | -0.11 | -0.05 | 1533            |
| <b>COX2</b>           | 35.9           | 14.3 | 10.3 | 39.5 | 75.4  | 24.6  | -0.05 | -0.16 | 679             |
| <b>COX3</b>           | 32.5           | 14.7 | 12.8 | 40   | 72.5  | 27.5  | -0.10 | -0.07 | 781             |
| <b>ND1</b>            | 49.5           | 13.5 | 7.9  | 29.1 | 78.6  | 21.4  | 0.26  | -0.26 | 948             |
| <b>ND2</b>            | 35.1           | 14.1 | 8.8  | 41.9 | 77    | 22.9  | -0.09 | -0.23 | 1,002           |
| <b>ND3</b>            | 34.5           | 12.1 | 8.2  | 45.2 | 79.7  | 20.3  | -0.13 | -0.19 | 354             |
| <b>ND4</b>            | 48.4           | 11.4 | 7.2  | 32.9 | 81.3  | 18.6  | 0.19  | -0.23 | 1318            |
| <b>ND4L</b>           | 50.5           | 10.4 | 5    | 34.1 | 84.6  | 15.4  | 0.19  | -0.35 | 285             |
| <b>ND5</b>            | 47.4           | 11.8 | 7.2  | 33.6 | 81    | 19    | 0.17  | -0.24 | 1,715           |
| <b>ND6</b>            | 38.3           | 12.0 | 5.4  | 44.3 | 82.6  | 17.4  | -0.07 | -0.38 | 503             |
| <b>rRNAs</b>          | 43.1           | 11.8 | 6    | 39.0 | 82.1  | 17.8  | 0.05  | -0.33 | <b>2,069</b>    |
| <b>l-rRNA</b>         | 39.4           | 6    | 12   | 42.6 | 82    | 18    | -0.04 | 0.33  | 1276            |
| <b>s-rRNA</b>         | 38.7           | 5.9  | 11.4 | 43.9 | 82.6  | 17.3  | -0.06 | 0.32  | 793             |
| <b>tRNAs</b>          | 40.7           | 11.7 | 9.4  | 38.2 | 78.9  | 21.1  | 0.03  | -0.11 | <b>1,413</b>    |
| <b>Control region</b> | 44.5           | 10.6 | 4.2  | 40.6 | 85.1  | 14.8  | 0.05  | -0.43 | <b>876</b>      |

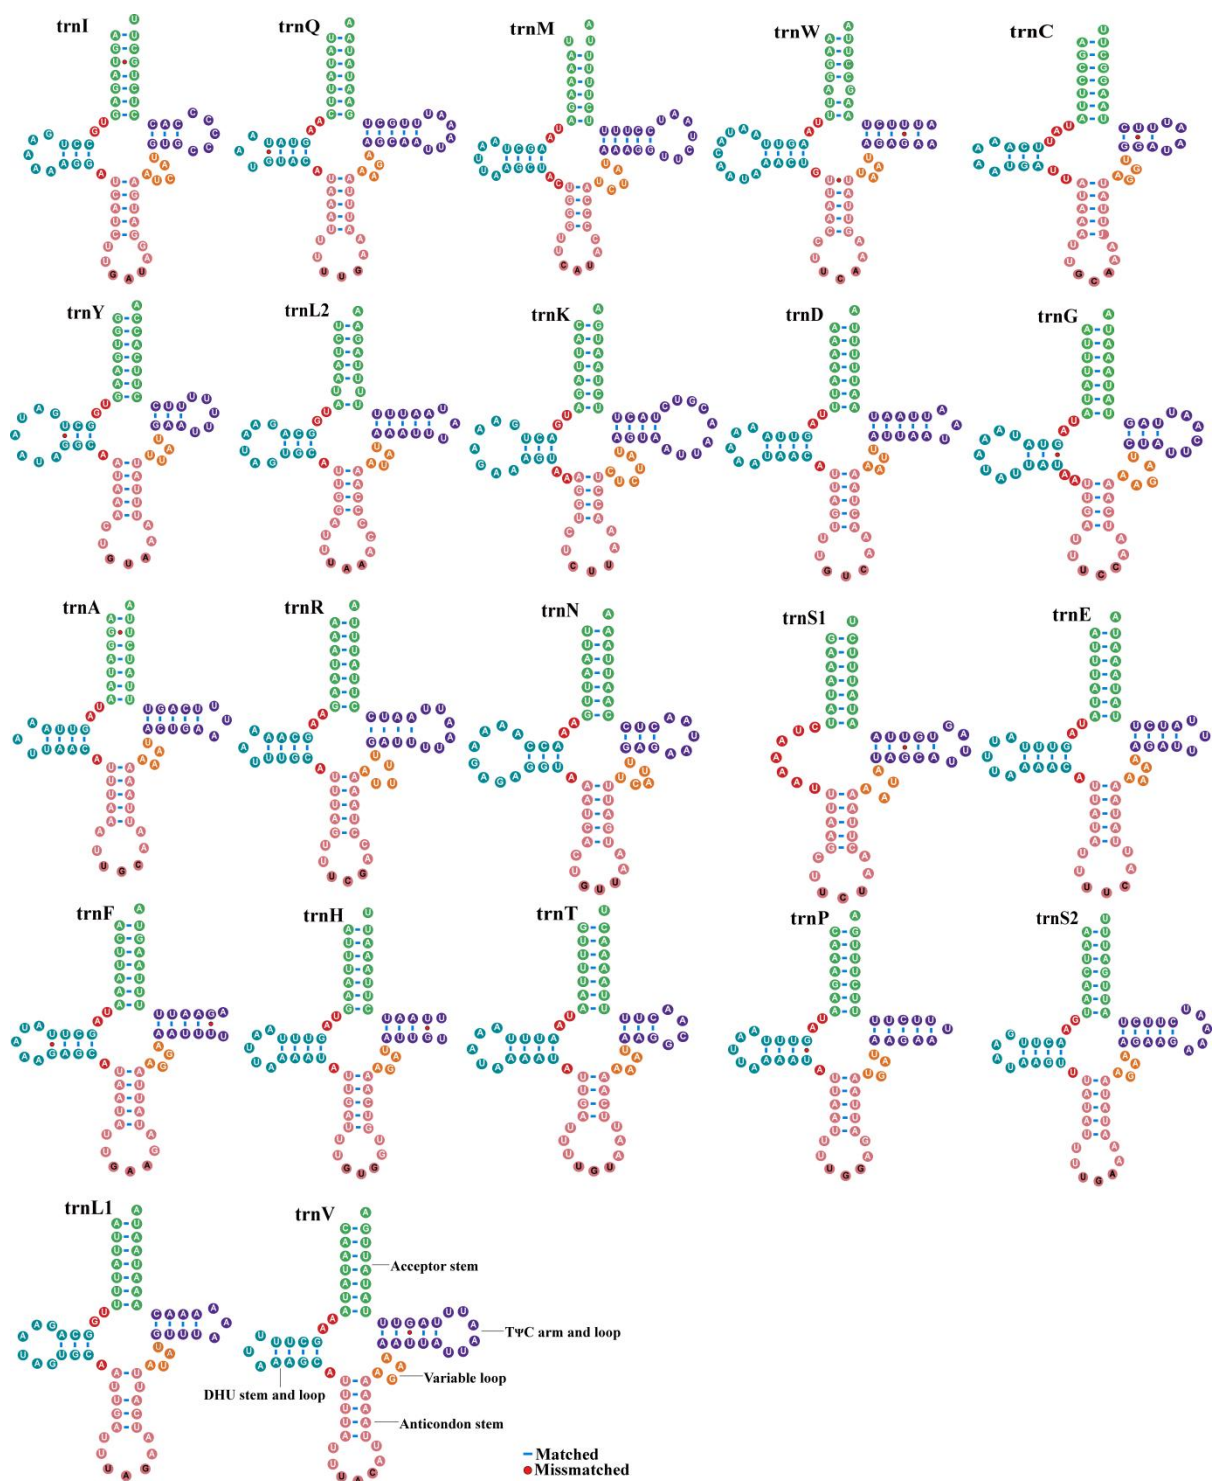

**Figure S1.** The predicted secondary structures of 22 tRNA genes inferred for *Scymnus (Pullus) cardi* sp. nov. The red circle dot indicates a mismatched base, and the blue line represents a matched base.

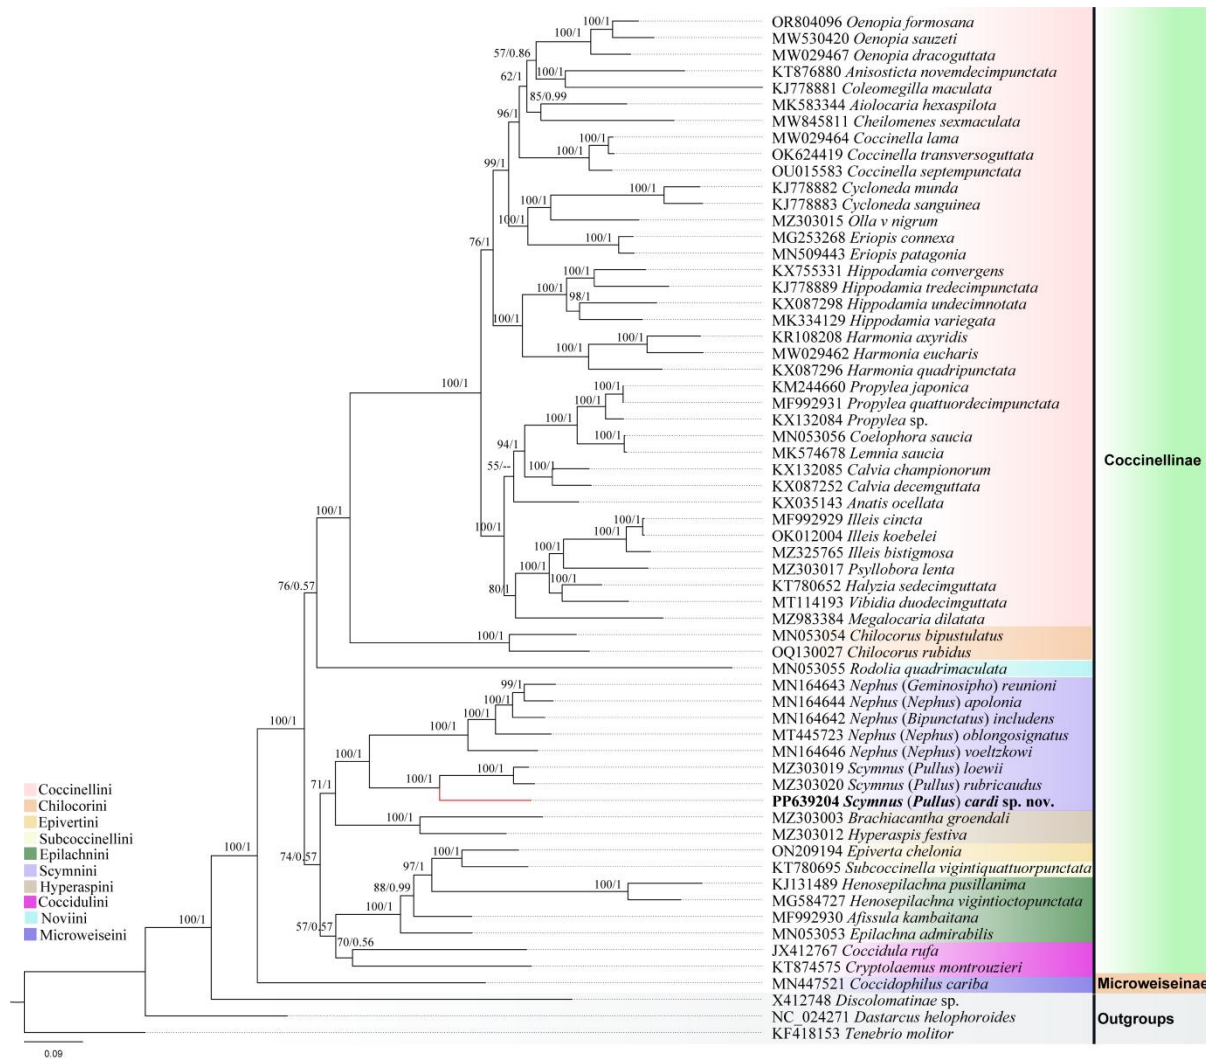

**Figure S2.** Phylogenetic relationships between *S. (P.) cardi* sp. nov. (highlighted in red and the tip is bold) and 61 other beetles. Tree inferred by maximum likelihood (ML) method based on 13 PCGs being translated into amino acids (13 PCG\_AA). Scale bar refers to a phylogenetic distance of 0.045 nucleotide substitutions per site. Node numbers show bootstrap support values (left) and Bayesian posterior probability support values (right). Different background colors indicate different tribes. (--) indicates that the node is not recovered by BI analysis.

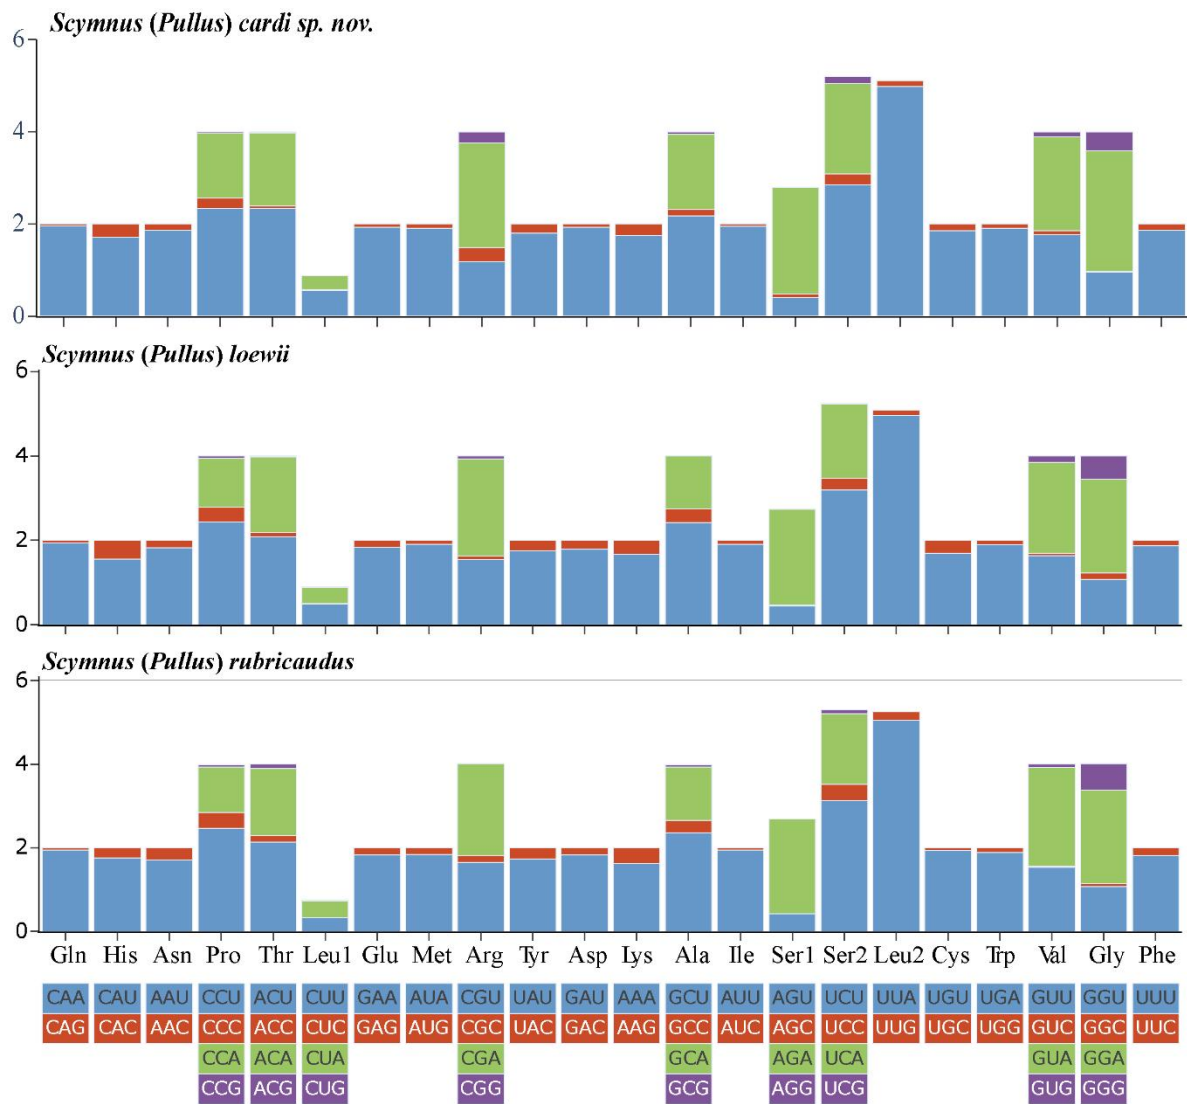

**Figure S3.** Relative synonymous codon usage (RSCU) of *Scymnus (Pullus) cardi* sp. nov., *Scymnus (Pullus) loewii*, and *Scymnus (Pullus) rubricaudus* mitochondrial genomes.

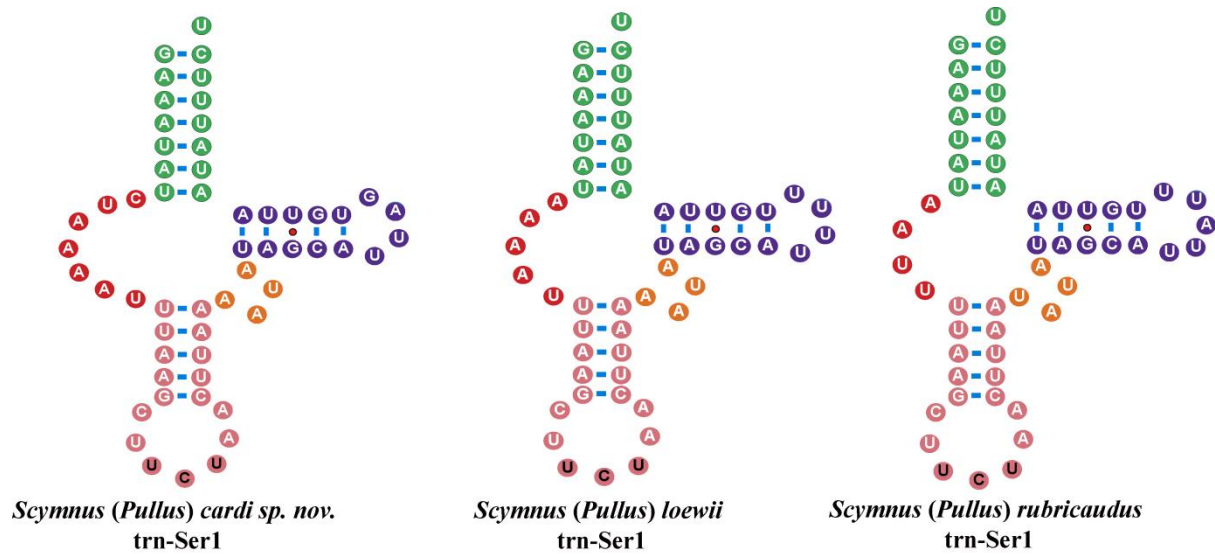

**Figure S4.** The predicted secondary cloverleaf structure for the trn-Ser1 genes of *Scymnus (Pullus) cardi* sp. nov., *Scymnus (Pullus) loewii*, and *Scymnus (Pullus) rubricaudus*.
